# Supplementary material for: A simple method for isolation and construction of markerless cyanobacterial mutants defective in acyl-acyl carrier protein synthetase
Source: PubMed Central journal article supplement (PMC5102962; doi:10.1007/s00253-016-7850-8), 2016-10-04
Supplement: 253_2016_7850_MOESM1_ESM.pdf [file 253_2016_7850_MOESM1_ESM.pdf]

## Supplementary material

Applied Microbiology and Biotechnology

A simple method for isolation and construction of markerless cyanobacterial mutants defective in acyl-acyl carrier protein synthetase

Kouji KOJIMA<sup>1,4,5</sup>, Sumie KETA<sup>1,4</sup>, Kazuma UESAKA<sup>2,4</sup>, Akihiro KATO<sup>2,4</sup>, Nobuyuki TAKATANI<sup>2,4</sup>,  
Kunio IHARA<sup>3,4</sup>, Tatsuo OMATA<sup>2,4</sup>, Makiko AICHI<sup>1,4,†</sup>

<sup>1</sup>Department of Biological Chemistry, Chubu University, Kasugai, 487-8501 Japan

<sup>2</sup>Graduate School of Bioagricultural Sciences, Nagoya University, Nagoya, 464-8601 Japan

<sup>3</sup>Center for Gene Research, Nagoya University, Nagoya, 464-8602 Japan

<sup>4</sup>Japan Science and Technology Agency, CREST

<sup>5</sup>Present address: Graduate School of Bioagricultural Sciences, Nagoya University, Nagoya, 464-8601  
Japan.

†To whom correspondence should be addressed

E-mail: [makiko@isc.chubu.ac.jp](mailto:makiko@isc.chubu.ac.jp)

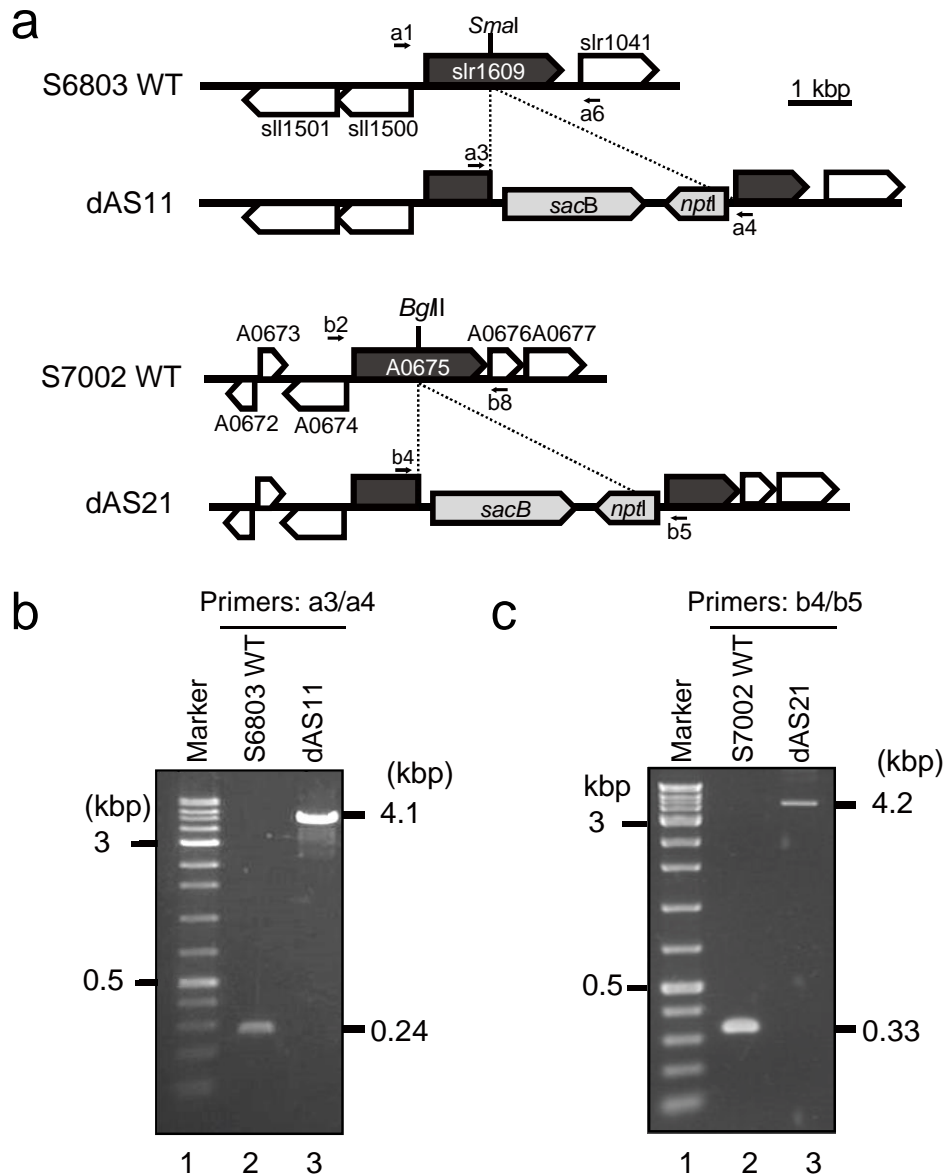

**Figure S1. Construction of *aas* insertional mutants from *Synechocystis* sp. PCC 6803 and *Synechococcus* sp. PCC 7002.** **a** Diagrams showing the maps of the *aas* loci of the wild-type and the mutant of the two cyanobacterial strains. The PCR primers used to screen for homozygous strains in the *aas* locus are also shown. The primer pair a3/a4 amplifies 0.24-kb and 4.1-kb DNA fragments from *Synechocystis* sp. PCC 6803 WT and the dAS11 mutant, respectively. The primer pair b4/b5 amplifies 0.33-kb and 4.2-kb fragments from *Synechococcus* sp. PCC 7002 WT and the dAS21 mutant, respectively. **b** and **c** DNA fragments amplified from the dAS11 and dAS21 mutants using the primer pairs a3/a4 and b4/b5, respectively. The PCR products were analyzed by electrophoresis on a 0.8% agarose gel.
